# Supplementary material for: TAVI-PREP: A Deep Learning-Based Tool for Automated Measurements Extraction in TAVI Planning
Source: MDPI journal article supplement (doi:10.3390/diagnostics13203181), 2023-10-11
Supplement: s1 [file s1]

## Supplementary information

# TAVI-PREP: A Deep Learning-Based Tool for Automated Measurements Extraction in TAVI Planning

**Figure S1.** Bland-Altman plot for aortic annulus

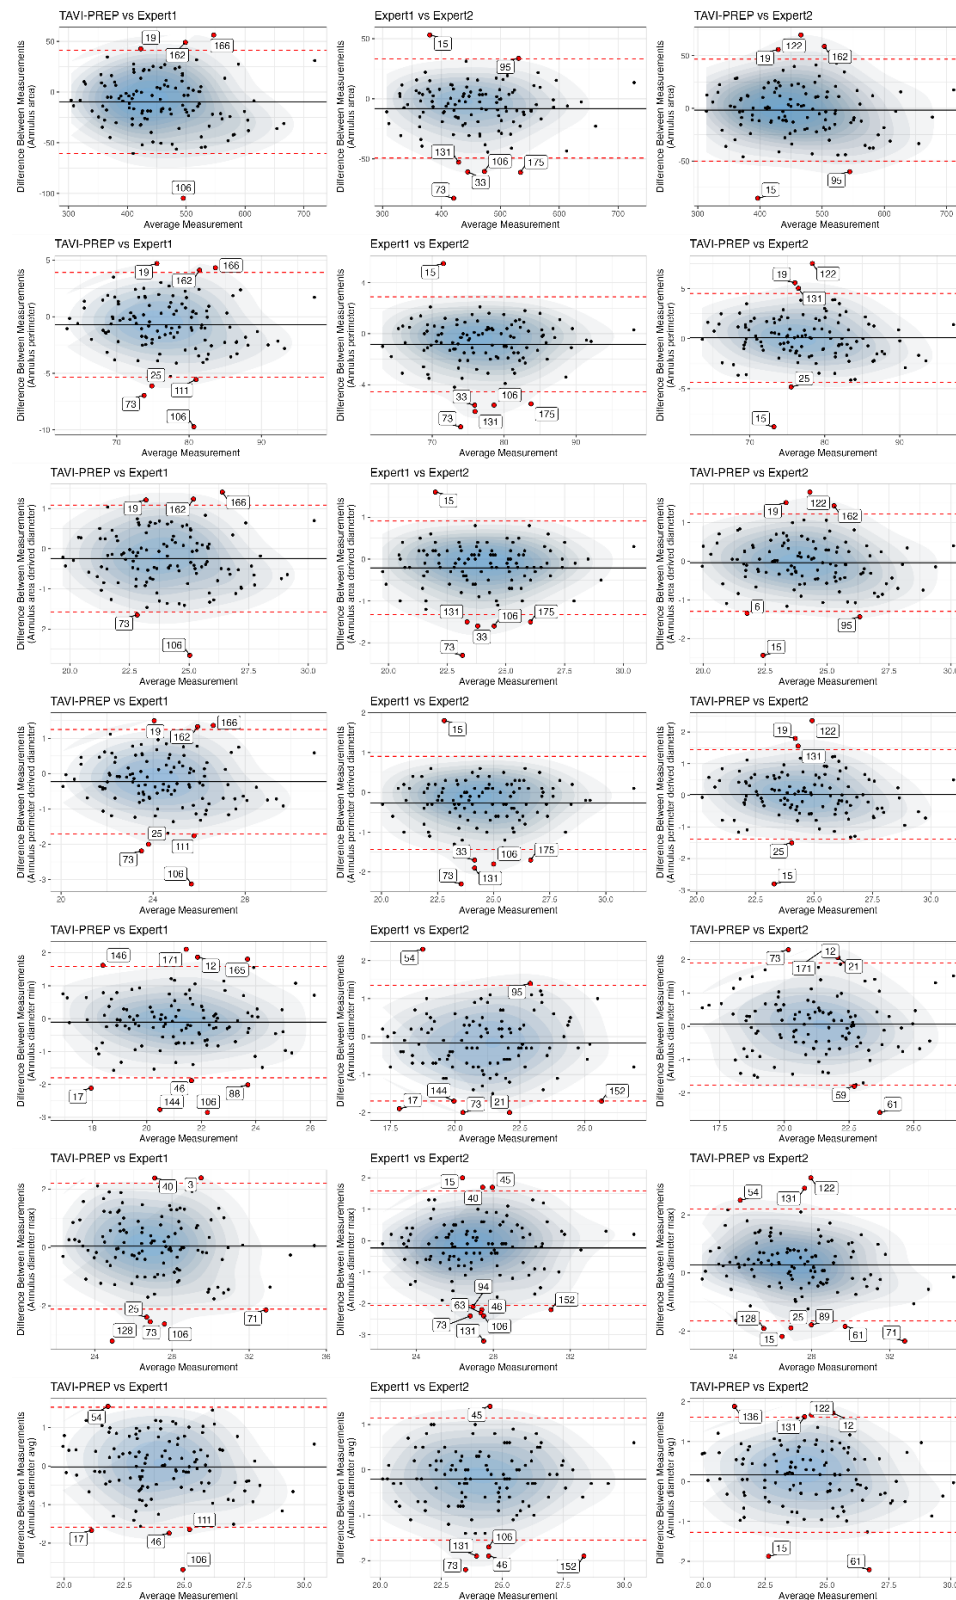

**Figure S2. Bland-Altman plot for LVOT**

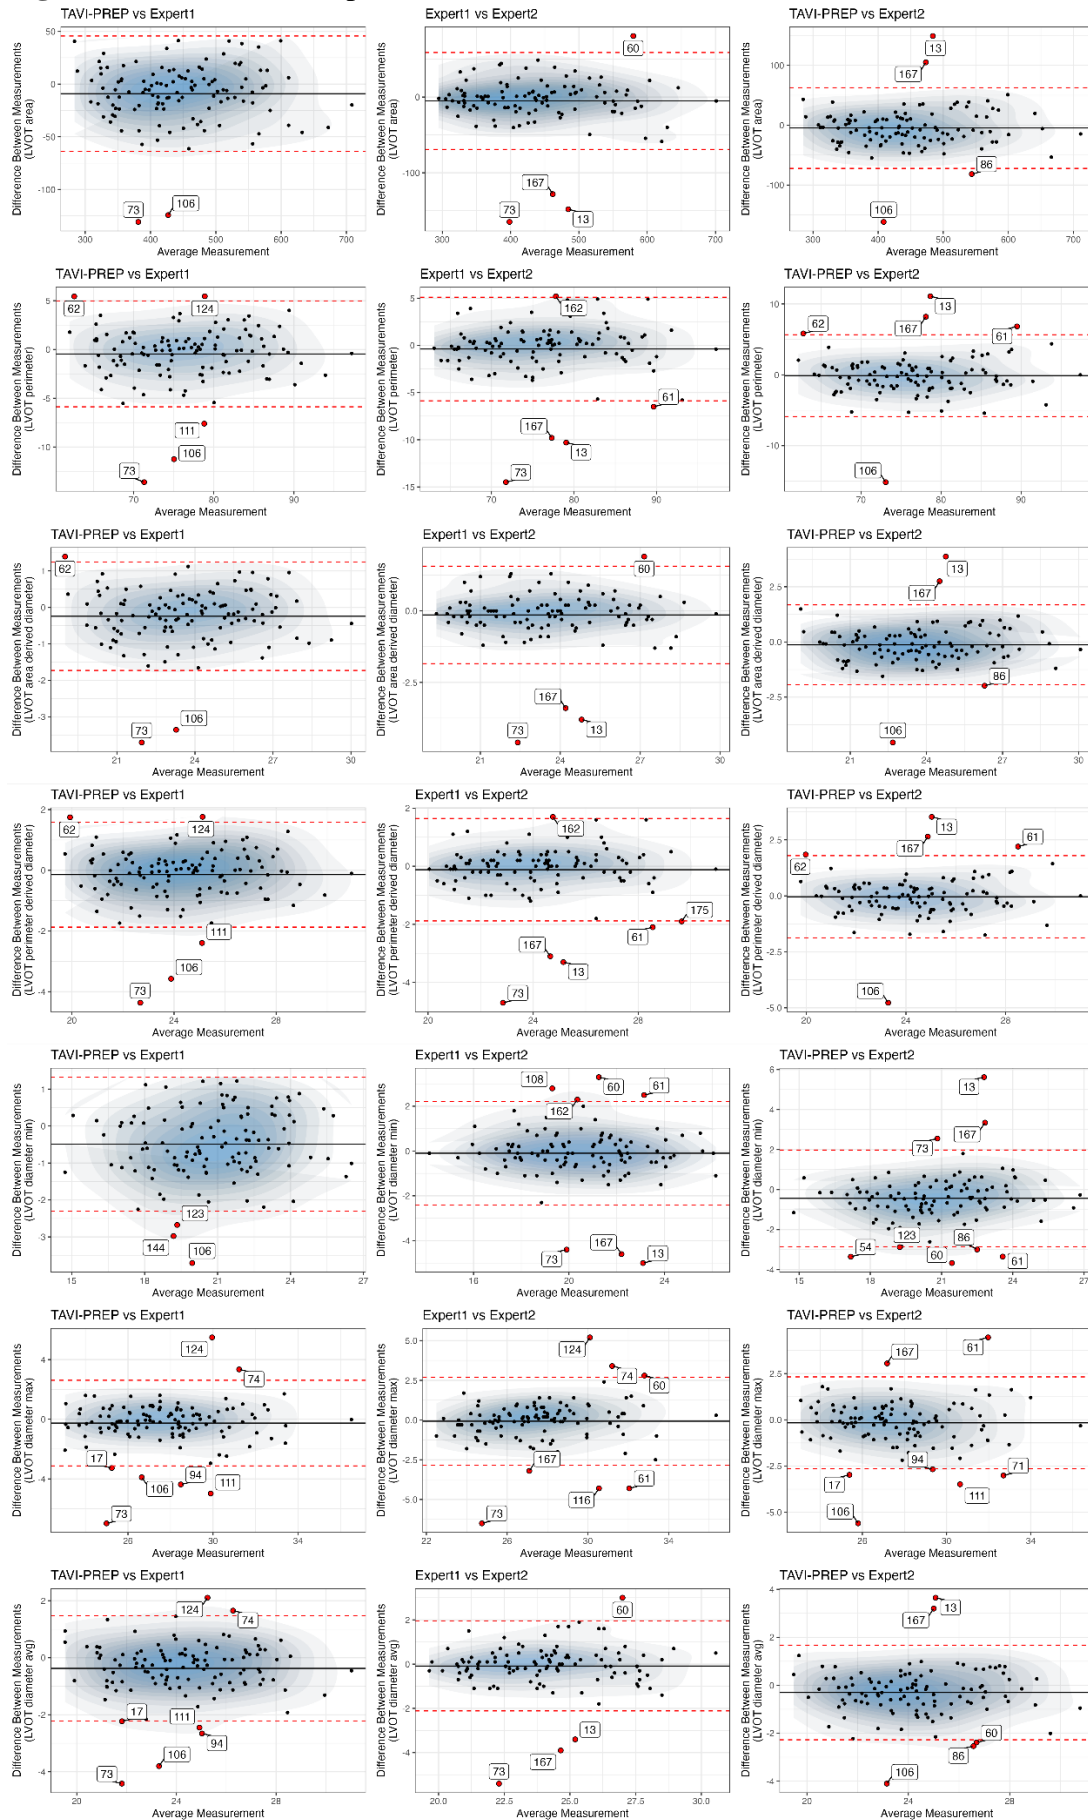

**Figure S3.** Bland-Altman plot for SNTJ

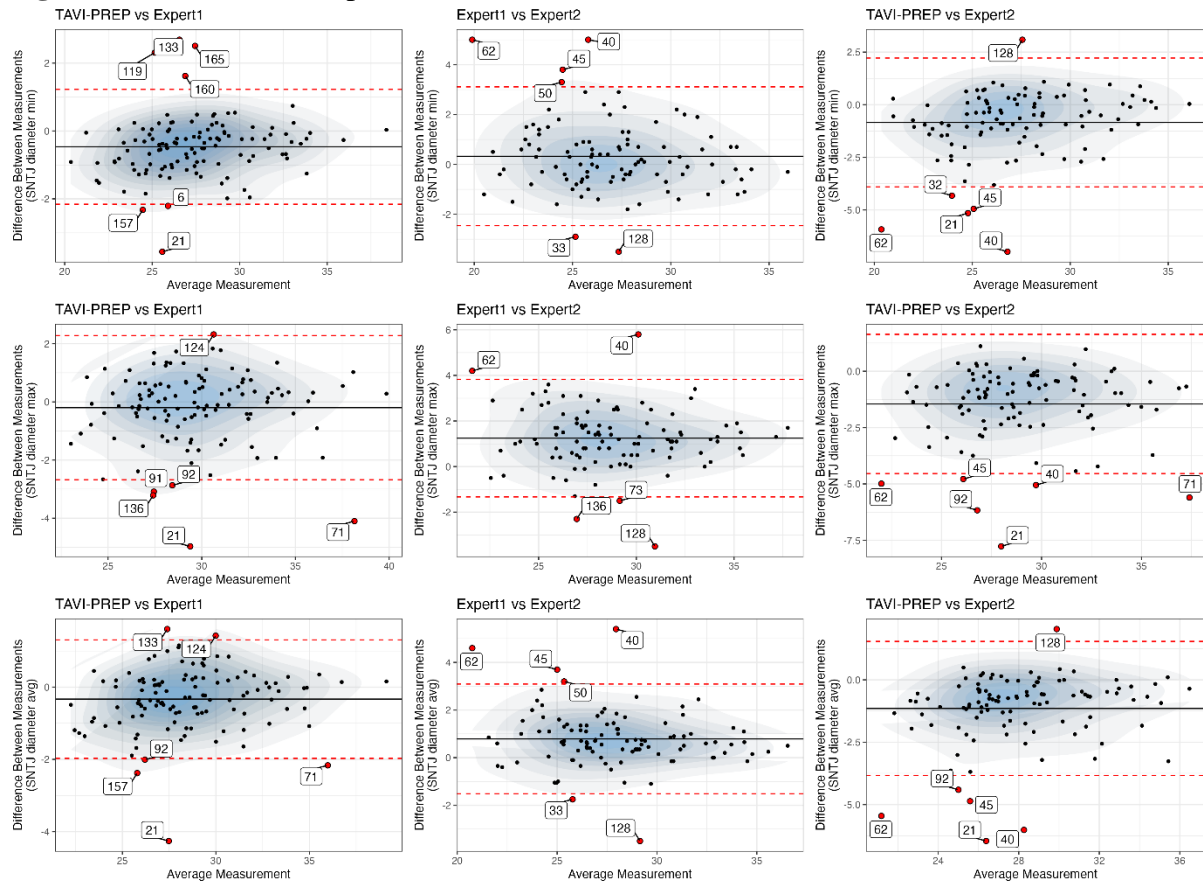

**Figure S4.** Bland-Altman plot for Sinus (RCC, LCC and NCC) and coronary heights (RCH, LCH)

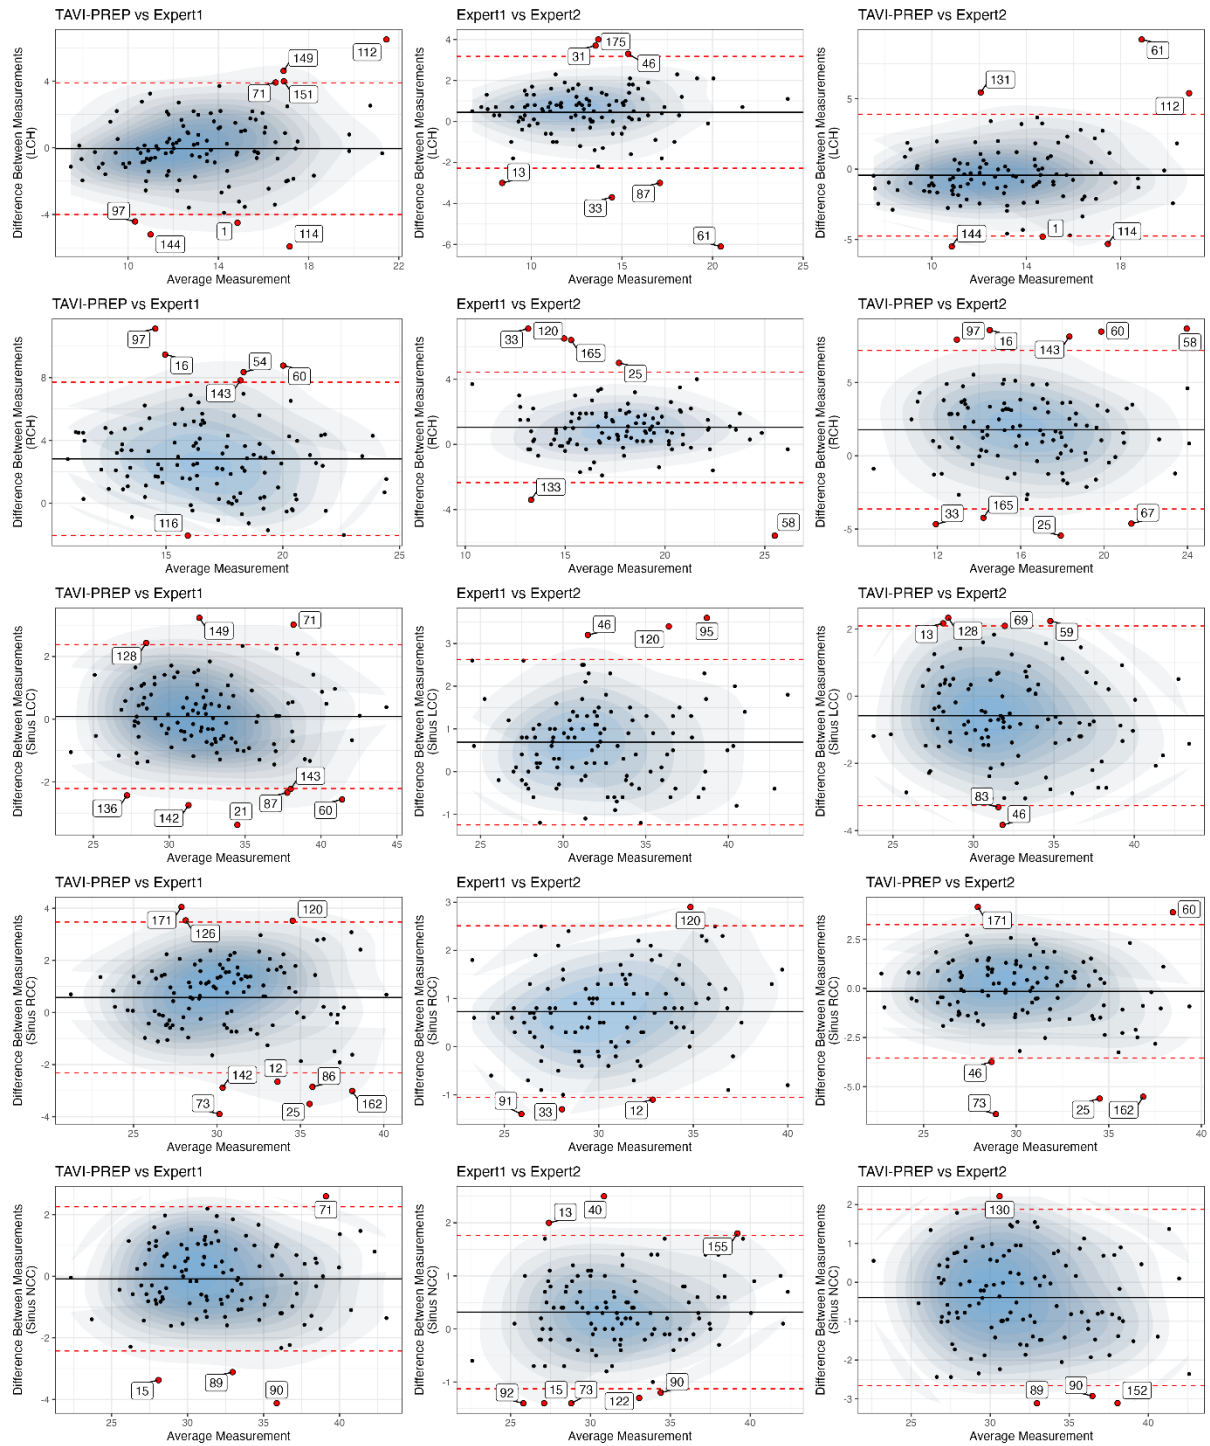

**Table S1.** TAVI-PREP vs Expert 1 correlation coefficients, absolute error and absolute relative error with their respective 95% confidence intervals

|                           |                            | Correlati<br>on | Correlati<br>on<br>95%<br>lower | Correlati<br>on<br>95%<br>upper | Absolu<br>te<br>error | Absolute<br>error<br>95% lower | Absolute<br>error<br>95% higher | Absolute relative<br>error | Absolute relative error 95%<br>lower | Absolute relative error 95%<br>higher | Absolute min<br>error | Absolute max<br>error |
|---------------------------|----------------------------|-----------------|---------------------------------|---------------------------------|-----------------------|--------------------------------|---------------------------------|----------------------------|--------------------------------------|---------------------------------------|-----------------------|-----------------------|
| <b>Aortic<br/>annulus</b> | Area                       | 0.949           | 0.931                           | 0.962                           | -9.647                | -60.650                        | 41.357                          | 4.879                      | 4.204                                | 5.553                                 | -104.734              | 56.271                |
|                           | Perimeter                  | 0.939           | 0.918                           | 0.955                           | -0.722                | -5.345                         | 3.902                           | 2.493                      | 2.125                                | 2.861                                 | -9.725                | 4.693                 |
|                           | Area derived diameter      | 0.948           | 0.930                           | 0.962                           | -0.244                | -1.575                         | 1.087                           | 2.421                      | 2.095                                | 2.746                                 | -2.655                | 1.408                 |
|                           | Perimeter derived diameter | 0.938           | 0.917                           | 0.954                           | -0.230                | -1.708                         | 1.249                           | 2.503                      | 2.133                                | 2.874                                 | -3.124                | 1.498                 |
|                           | Diameter min               | 0.912           | 0.882                           | 0.934                           | -0.104                | -1.798                         | 1.591                           | 3.038                      | 2.516                                | 3.559                                 | -2.853                | 2.109                 |
|                           | Diameter max               | 0.908           | 0.877                           | 0.931                           | 0.044                 | -2.114                         | 2.203                           | 3.147                      | 2.676                                | 3.619                                 | -3.207                | 2.381                 |
|                           | Diameter avg               | 0.934           | 0.911                           | 0.951                           | -0.029                | -1.583                         | 1.524                           | 2.657                      | 2.297                                | 3.017                                 | -2.687                | 1.546                 |
| <b>LVOT</b>               | Area                       | 0.951           | 0.934                           | 0.963                           | -9.064                | -63.762                        | 45.634                          | 5.046                      | 4.034                                | 6.058                                 | -130.765              | 41.244                |
|                           | Perimeter                  | 0.933           | 0.910                           | 0.950                           | -0.454                | -5.877                         | 4.968                           | 2.602                      | 2.075                                | 3.128                                 | -13.609               | 5.453                 |
|                           | Area derived diameter      | 0.948           | 0.931                           | 0.962                           | -0.242                | -1.729                         | 1.244                           | 2.478                      | 2.010                                | 2.946                                 | -3.703                | 1.394                 |
|                           | Perimeter derived diameter | 0.933           | 0.910                           | 0.950                           | -0.142                | -1.869                         | 1.585                           | 2.597                      | 2.069                                | 3.126                                 | -4.363                | 1.762                 |
|                           | Diameter min               | 0.929           | 0.905                           | 0.947                           | -0.492                | -2.308                         | 1.324                           | 4.186                      | 3.565                                | 4.808                                 | -3.708                | 1.218                 |
|                           | Diameter max               | 0.861           | 0.816                           | 0.895                           | -0.260                | -3.131                         | 2.611                           | 3.607                      | 2.812                                | 4.402                                 | -6.983                | 5.485                 |
|                           | Diameter avg               | 0.924           | 0.898                           | 0.943                           | -0.375                | -2.223                         | 1.472                           | 3.045                      | 2.448                                | 3.642                                 | -4.416                | 2.105                 |
| <b>SNTJ</b>               | Diameter min               | 0.967           | 0.955                           | 0.975                           | -0.465                | -2.157                         | 1.227                           | 2.775                      | 2.302                                | 3.248                                 | -3.555                | 2.688                 |
|                           | Diameter max               | 0.930           | 0.906                           | 0.948                           | -0.198                | -2.678                         | 2.282                           | 3.252                      | 2.692                                | 3.812                                 | -4.968                | 2.320                 |
|                           | Diameter avg               | 0.968           | 0.957                           | 0.976                           | -0.331                | -1.974                         | 1.311                           | 2.421                      | 1.998                                | 2.845                                 | -4.261                | 1.608                 |
| <b>Corona<br/>ry</b>      | LCH                        | 0.799           | 0.736                           | 0.848                           | -0.054                | -4.002                         | 3.894                           | 11.604                     | 9.681                                | 13.526                                | -5.920                | 6.498                 |
|                           | RCH                        | 0.718           | 0.635                           | 0.784                           | 2.822                 | -2.063                         | 7.708                           | 16.465                     | 14.415                               | 18.515                                | -2.069                | 11.120                |
| <b>Sinus</b>              | LCC                        | 0.961           | 0.947                           | 0.971                           | 0.083                 | -2.214                         | 2.379                           | 2.824                      | 2.424                                | 3.225                                 | -3.373                | 3.233                 |
|                           | RCC                        | 0.929           | 0.905                           | 0.948                           | 0.578                 | -2.314                         | 3.470                           | 4.077                      | 3.567                                | 4.587                                 | -3.897                | 4.046                 |
|                           | NCC                        | 0.959           | 0.945                           | 0.970                           | -0.085                | -2.427                         | 2.257                           | 3.048                      | 2.644                                | 3.451                                 | -4.125                | 2.597                 |

**Table S2.** TAVI-PREP vs Expert 2 correlation coefficients, absolute error and absolute relative error with their respective 95% confidence intervals

|                           |                            | Correlati<br>on | Correlati<br>on<br>95%<br>lower | Correlati<br>on<br>95%<br>upper | Absolu<br>te<br>error | Absolute<br>error<br>95%<br>lower | Absolute<br>error<br>95%<br>higher | Absolute relative<br>error | Absolute relative error 95%<br>lower | Absolute relative error 95%<br>higher | Absolute min<br>error | Absolute max<br>error |
|---------------------------|----------------------------|-----------------|---------------------------------|---------------------------------|-----------------------|-----------------------------------|------------------------------------|----------------------------|--------------------------------------|---------------------------------------|-----------------------|-----------------------|
| <b>Aortic<br/>annulus</b> | Area                       | 0.954           | 0.939                           | 0.966                           | -1.695                | -50.012                           | 46.622                             | 4.174                      | 3.521                                | 4.827                                 | -85.300               | 69.604                |
|                           | Perimeter                  | 0.944           | 0.925                           | 0.959                           | 0.095                 | -4.344                            | 4.534                              | 2.216                      | 1.860                                | 2.571                                 | -8.803                | 7.518                 |
|                           | Area derived diameter      | 0.954           | 0.938                           | 0.966                           | -0.038                | -1.299                            | 1.223                              | 2.062                      | 1.743                                | 2.381                                 | -2.434                | 1.787                 |
|                           | Perimeter derived diameter | 0.945           | 0.925                           | 0.959                           | 0.030                 | -1.378                            | 1.439                              | 2.224                      | 1.872                                | 2.575                                 | -2.802                | 2.360                 |
|                           | Diameter min               | 0.897           | 0.863                           | 0.923                           | 0.067                 | -1.759                            | 1.893                              | 3.441                      | 2.951                                | 3.932                                 | -2.583                | 2.309                 |
|                           | Diameter max               | 0.928           | 0.903                           | 0.946                           | 0.276                 | -1.652                            | 2.204                              | 2.858                      | 2.421                                | 3.296                                 | -2.341                | 3.273                 |
|                           | Diameter avg               | 0.944           | 0.925                           | 0.959                           | 0.169                 | -1.270                            | 1.608                              | 2.495                      | 2.156                                | 2.833                                 | -2.209                | 1.881                 |
| <b>LVOT</b>               | Area                       | 0.929           | 0.903                           | 0.948                           | -4.828                | -72.182                           | 62.527                             | 5.629                      | 4.505                                | 6.752                                 | -161.598              | 149.041               |
|                           | Perimeter                  | 0.926           | 0.900                           | 0.946                           | -0.112                | -5.883                            | 5.658                              | 2.612                      | 2.060                                | 3.165                                 | -15.153               | 11.089                |
|                           | Area derived diameter      | 0.927           | 0.900                           | 0.946                           | -0.131                | -1.941                            | 1.679                              | 2.801                      | 2.259                                | 3.343                                 | -4.554                | 3.870                 |
|                           | Perimeter derived diameter | 0.926           | 0.900                           | 0.946                           | -0.038                | -1.875                            | 1.798                              | 2.619                      | 2.070                                | 3.168                                 | -4.773                | 3.528                 |
|                           | Diameter min               | 0.881           | 0.840                           | 0.912                           | -0.437                | -2.850                            | 1.977                              | 4.537                      | 3.684                                | 5.390                                 | -3.670                | 5.620                 |
|                           | Diameter max               | 0.893           | 0.856                           | 0.921                           | -0.164                | -2.650                            | 2.322                              | 3.238                      | 2.603                                | 3.874                                 | -5.596                | 4.456                 |
|                           | Diameter avg               | 0.913           | 0.883                           | 0.936                           | -0.303                | -2.274                            | 1.669                              | 3.149                      | 2.571                                | 3.727                                 | -4.102                | 3.650                 |
| <b>SNTJ</b>               | Diameter min               | 0.901           | 0.865                           | 0.928                           | -0.842                | -3.902                            | 2.218                              | 4.878                      | 3.730                                | 6.026                                 | -6.984                | 3.088                 |
|                           | Diameter max               | 0.895           | 0.857                           | 0.923                           | -1.453                | -4.540                            | 1.634                              | 5.748                      | 4.596                                | 6.900                                 | -7.768                | 1.112                 |
|                           | Diameter avg               | 0.920           | 0.890                           | 0.941                           | -1.148                | -3.835                            | 1.540                              | 4.827                      | 3.752                                | 5.902                                 | -6.461                | 2.034                 |
| <b>Corona<br/>ry</b>      | LCH                        | 0.766           | 0.693                           | 0.823                           | -0.429                | -4.756                            | 3.898                              | 13.425                     | 11.235                               | 15.614                                | -5.497                | 9.214                 |
|                           | RCH                        | 0.675           | 0.579                           | 0.753                           | 1.776                 | -3.630                            | 7.183                              | 15.334                     | 13.287                               | 17.380                                | -5.451                | 8.667                 |
| <b>Sinus</b>              | LCC                        | 0.946           | 0.927                           | 0.960                           | -0.583                | -3.255                            | 2.090                              | 3.867                      | 3.360                                | 4.374                                 | -3.830                | 2.330                 |
|                           | RCC                        | 0.898           | 0.864                           | 0.925                           | -0.145                | -3.544                            | 3.254                              | 4.331                      | 3.640                                | 5.022                                 | -6.397                | 4.146                 |
|                           | NCC                        | 0.961           | 0.947                           | 0.971                           | -0.392                | -2.661                            | 1.877                              | 3.161                      | 2.748                                | 3.574                                 | -3.113                | 2.213                 |

**Table S3.** Expert 1 vs Expert 2 correlation coefficients, absolute error and absolute relative error with their respective 95% confidence intervals

|                           |                            | Correlati<br>on | Correlati<br>on<br>95%<br>lower | Correlati<br>on<br>95%<br>upper | Absolu<br>te<br>error | Absolute<br>error<br>95% lower | Absolute<br>error<br>95% higher | Absolute relative<br>error | Absolute relative error 95%<br>lower | Absolute relative error 95%<br>higher | Absolute min<br>error | Absolute max<br>error |
|---------------------------|----------------------------|-----------------|---------------------------------|---------------------------------|-----------------------|--------------------------------|---------------------------------|----------------------------|--------------------------------------|---------------------------------------|-----------------------|-----------------------|
| <b>Aortic<br/>annulus</b> | Area                       | 0.965           | 0.953                           | 0.974                           | -8.078                | -49.298                        | 33.142                          | 3.748                      | 3.071                                | 4.425                                 | -82.600               | 53.100                |
|                           | Perimeter                  | 0.959           | 0.944                           | 0.970                           | -0.832                | -4.557                         | 2.894                           | 1.966                      | 1.609                                | 2.322                                 | -7.300                | 5.500                 |
|                           | Area derived diameter      | 0.963           | 0.949                           | 0.972                           | -0.209                | -1.326                         | 0.907                           | 1.853                      | 1.517                                | 2.188                                 | -2.300                | 1.600                 |
|                           | Perimeter derived diameter | 0.960           | 0.945                           | 0.970                           | -0.266                | -1.439                         | 0.907                           | 1.948                      | 1.595                                | 2.301                                 | -2.300                | 1.800                 |
|                           | Diameter min               | 0.928           | 0.903                           | 0.947                           | -0.172                | -1.698                         | 1.354                           | 3.040                      | 2.615                                | 3.466                                 | -2.000                | 2.300                 |
|                           | Diameter max               | 0.928           | 0.903                           | 0.947                           | -0.238                | -2.061                         | 1.586                           | 2.649                      | 2.211                                | 3.087                                 | -3.200                | 2.000                 |
|                           | Diameter avg               | 0.947           | 0.929                           | 0.961                           | -0.202                | -1.543                         | 1.140                           | 2.295                      | 1.942                                | 2.647                                 | -2.200                | 1.400                 |
| <b>LVOT</b>               | Area                       | 0.936           | 0.913                           | 0.953                           | -5.224                | -69.257                        | 58.810                          | 4.753                      | 3.455                                | 6.052                                 | -164.900              | 80.600                |
|                           | Perimeter                  | 0.935           | 0.911                           | 0.952                           | -0.389                | -5.878                         | 5.099                           | 2.331                      | 1.756                                | 2.907                                 | -14.500               | 5.200                 |
|                           | Area derived diameter      | 0.935           | 0.912                           | 0.953                           | -0.139                | -1.844                         | 1.566                           | 2.330                      | 1.736                                | 2.923                                 | -4.600                | 1.900                 |
|                           | Perimeter derived diameter | 0.933           | 0.910                           | 0.951                           | -0.119                | -1.882                         | 1.644                           | 2.347                      | 1.766                                | 2.928                                 | -4.700                | 1.700                 |
|                           | Diameter min               | 0.893           | 0.855                           | 0.921                           | -0.096                | -2.409                         | 2.216                           | 3.780                      | 2.936                                | 4.624                                 | -5.000                | 3.300                 |
|                           | Diameter max               | 0.875           | 0.832                           | 0.908                           | -0.075                | -2.847                         | 2.698                           | 3.298                      | 2.534                                | 4.061                                 | -6.500                | 5.200                 |
|                           | Diameter avg               | 0.910           | 0.878                           | 0.934                           | -0.084                | -2.114                         | 1.947                           | 2.743                      | 2.067                                | 3.420                                 | -5.400                | 3.000                 |
| <b>SNTJ</b>               | Diameter min               | 0.919           | 0.889                           | 0.941                           | 0.327                 | -2.455                         | 3.108                           | 3.992                      | 3.242                                | 4.742                                 | -3.500                | 5.000                 |
|                           | Diameter max               | 0.927           | 0.900                           | 0.947                           | 1.248                 | -1.331                         | 3.827                           | 5.078                      | 4.372                                | 5.784                                 | -3.500                | 5.800                 |
|                           | Diameter avg               | 0.942           | 0.920                           | 0.958                           | 0.788                 | -1.516                         | 3.091                           | 3.791                      | 3.111                                | 4.472                                 | -3.500                | 5.400                 |
| <b>Corona<br/>ry</b>      | LCH                        | 0.915           | 0.886                           | 0.937                           | 0.448                 | -2.278                         | 3.174                           | 8.209                      | 6.900                                | 9.518                                 | -6.100                | 4.000                 |
|                           | RCH                        | 0.863           | 0.816                           | 0.898                           | 1.045                 | -2.345                         | 4.436                           | 8.090                      | 6.595                                | 9.585                                 | -5.600                | 7.100                 |
| <b>Sinus</b>              | LCC                        | 0.970           | 0.960                           | 0.978                           | 0.689                 | -1.247                         | 2.625                           | 2.835                      | 2.422                                | 3.249                                 | -1.200                | 3.600                 |
|                           | RCC                        | 0.972           | 0.962                           | 0.979                           | 0.730                 | -1.053                         | 2.513                           | 3.046                      | 2.673                                | 3.418                                 | -1.400                | 2.900                 |
|                           | NCC                        | 0.984           | 0.979                           | 0.989                           | 0.318                 | -1.126                         | 1.761                           | 1.949                      | 1.652                                | 2.246                                 | -1.400                | 2.500                 |
